# Supplementary material for: Perovskite nanocrystal doped all-inorganic glass for X-ray scintillators
Source: Royal Society of Chemistry journal article supplement (doi:10.1039/d0tc05979j), 2021-01-01
Supplement: d0tc05979j1.pdf [file d0tc05979j1.pdf]

## Perovskite nanocrystals doped all-inorganic glass for X-ray scintillator

Yinsheng Xu,<sup>a</sup> Xudong Zhao,<sup>a</sup> Mengling Xia<sup>\*b</sup> and Xianghua Zhang<sup>a,c</sup>

<sup>a</sup>State Key Laboratory of Silicate Materials for Architectures, Wuhan University of Technology, Wuhan, Hubei 430074, China

<sup>b</sup>Wuhan National Laboratory for Optoelectronics (WNLO), Huazhong University of Science and Technology (HUST), Wuhan, Hubei 430074, China

<sup>c</sup>Laboratoire des Verres et Céramiques, UMR-CNRS 6226, Sciences chimiques de Rennes, Université de Rennes 1, Rennes, 35042, France

E-mail: [xiamengling@hust.edu.cn](mailto:xiamengling@hust.edu.cn)

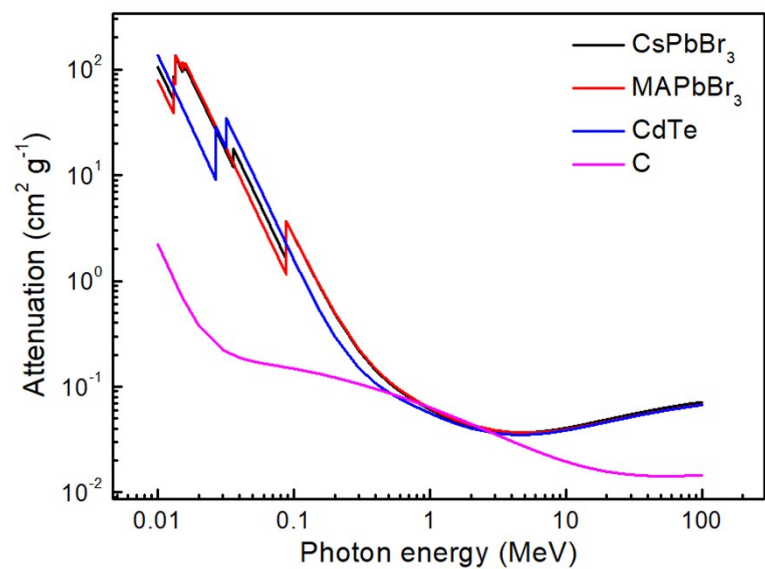

**Fig. S1** Attenuation coefficient for some perovskites and traditional semiconductors towards high-energy photons.

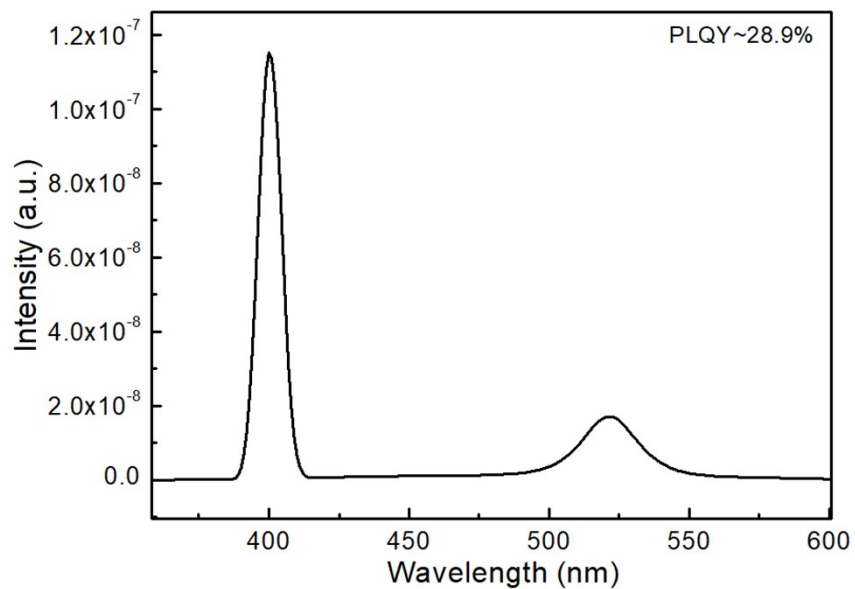

**Fig. S2** PLQY result of PNC glass-ceramic heat-treated at 470 °C for 10 h.

**Table S1** Fitting data of the photoluminescence decay curves of PNC glass-ceramic

| HT condition | $\tau_1$ (ns) | $\tau_2$ (ns) | <i>R-square</i> |
|--------------|---------------|---------------|-----------------|
| 450 °C/10h   | 1.3           | 11.4          | 98.4%           |
| 470 °C/10h   | 2.6           | 13.0          | 99.9%           |
| 490 °C/10h   | 2.6           | 13.1          | 99.8%           |

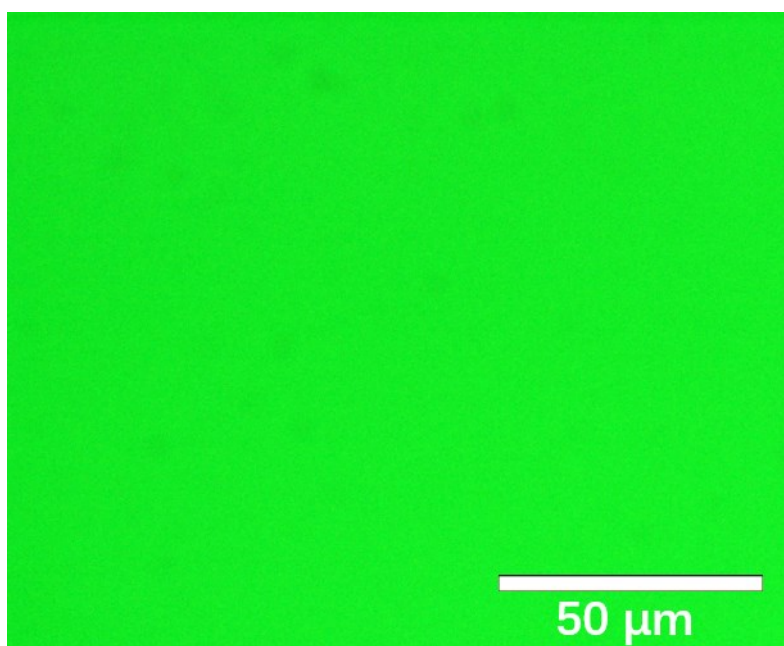

**Fig. S3** Surface PL mapping of PNC glass-ceramic after immersing in water for 2 weeks.

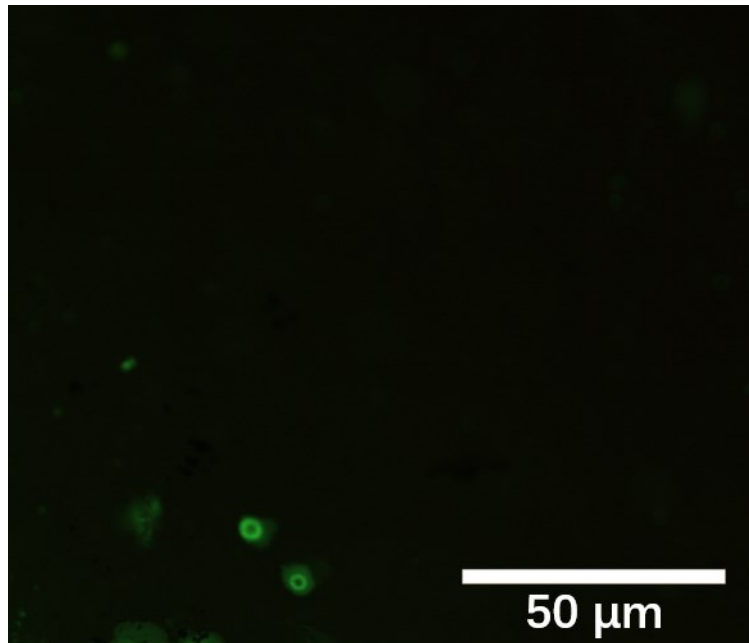

**Fig. S4** Surface PL mapping of PNC-film on glass after immersing in water for 2 hours.

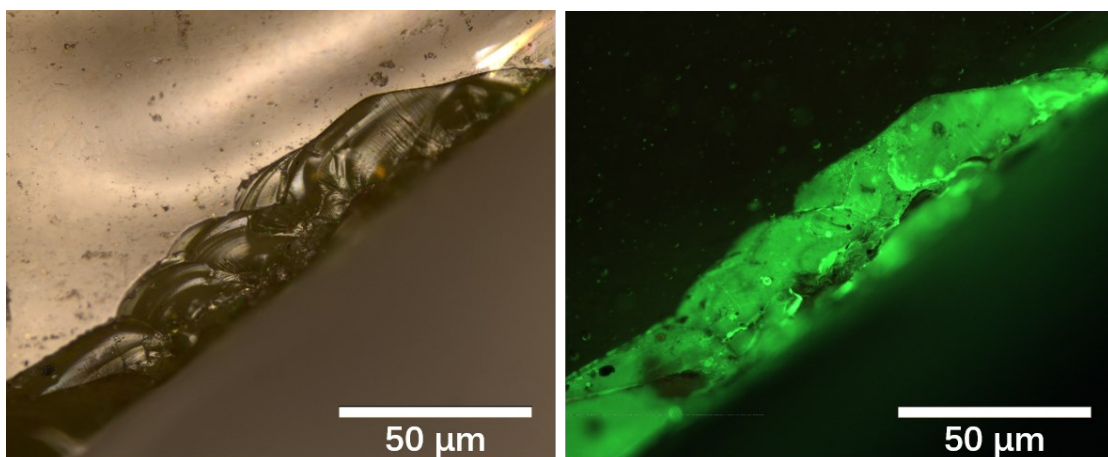

**Fig. S5** Surface PL mapping of PNC glass-ceramic focusing on the side face.

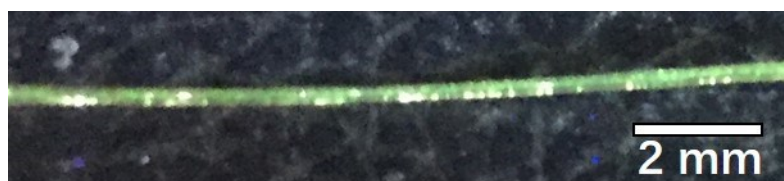

**Fig. S6** A PNC glass-ceramic fiber.
